# Supplementary material for: Thermal Response of Laboratory Rats (Rattus norvegicus) during the Application of Six Methods of Euthanasia Assessed by Infrared Thermography
Source: MDPI journal article supplement (doi:10.3390/ani13182820), 2023-09-05
Supplement: s1 [file s1]

**Table S1.** Correlations “Pentobarbital” (G<sub>1</sub>)

|                               | T <sup>o</sup> <sub>ocu</sub> | T <sup>o</sup> <sub>ear</sub> | T <sup>o</sup> <sub>dor</sub> | T <sup>o</sup> <sub>tai</sub> |
|-------------------------------|-------------------------------|-------------------------------|-------------------------------|-------------------------------|
| T <sup>o</sup> <sub>ocu</sub> | 1.00                          | 0.991                         | 0.986                         | 0.374                         |
|                               | P<0.001                       | P<0.001                       | P<0.001                       | P<0.001                       |
| T <sup>o</sup> <sub>ear</sub> | 0.991                         | 1.00                          | 0.977                         | 0.370                         |
|                               | P<0.001                       | P<0.001                       | P<0.001                       | P<0.001                       |
| T <sup>o</sup> <sub>dor</sub> | 0.986                         | 0.977                         | 1.00                          | 0.377                         |
|                               | P<0.001                       | P<0.001                       | P<0.001                       | P<0.001                       |
| T <sup>o</sup> <sub>tai</sub> | 0.374                         | 0.370                         | 0.377                         | 1.00                          |
|                               | P<0.001                       | P<0.001                       | P<0.001                       | P<0.001                       |

**Table S2.** Correlations “CO<sub>2</sub> overdose” (G<sub>2</sub>)

|                               | T <sup>o</sup> <sub>ocu</sub> | T <sup>o</sup> <sub>ear</sub> | T <sup>o</sup> <sub>dor</sub> | T <sup>o</sup> <sub>tai</sub> |
|-------------------------------|-------------------------------|-------------------------------|-------------------------------|-------------------------------|
| T <sup>o</sup> <sub>ocu</sub> | 1.00                          | 0.992                         | 0.973                         | 0.960                         |
|                               | P<0.001                       | P<0.001                       | P<0.001                       | P<0.001                       |
| T <sup>o</sup> <sub>ear</sub> | 0.992                         | 1.00                          | 0.971                         | 0.963                         |
|                               | P<0.001                       | P<0.001                       | P<0.001                       | P<0.001                       |
| T <sup>o</sup> <sub>dor</sub> | 0.973                         | 0.971                         | 1.00                          | 0.977                         |
|                               | P<0.001                       | P<0.001                       | P<0.001                       | P<0.001                       |
| T <sup>o</sup> <sub>tai</sub> | 0.960                         | 0.963                         | 0.977                         | 1.00                          |
|                               | P<0.001                       | P<0.001                       | P<0.001                       | P<0.001                       |

**Table S3.** Correlations “Decapitation” (G<sub>3</sub>)

|                               | T <sup>o</sup> <sub>ocu</sub> | T <sup>o</sup> <sub>ear</sub> | T <sup>o</sup> <sub>dor</sub> | T <sup>o</sup> <sub>tai</sub> |
|-------------------------------|-------------------------------|-------------------------------|-------------------------------|-------------------------------|
| T <sup>o</sup> <sub>ocu</sub> | 1.00                          | 0.989                         | 0.965                         | 0.988                         |
|                               | P<0.001                       | P<0.001                       | P<0.001                       | P<0.001                       |
| T <sup>o</sup> <sub>ear</sub> | 0.989                         | 1.00                          | 0.955                         | 0.989                         |
|                               | P<0.001                       | P<0.001                       | P<0.001                       | P<0.001                       |
| T <sup>o</sup> <sub>dor</sub> | 0.965                         | 0.955                         | 1.00                          | 0.972                         |
|                               | P<0.001                       | P<0.001                       | P<0.001                       | P<0.001                       |
| T <sup>o</sup> <sub>tai</sub> | 0.988                         | 0.989                         | 0.972                         | 1.00                          |
|                               | P<0.001                       | P<0.001                       | P<0.001                       | P<0.001                       |

**Table S4.** Correlations “Inhalation of isoflurane” (G<sub>4</sub>)

|                               | T <sup>o</sup> <sub>ocu</sub> | T <sup>o</sup> <sub>ear</sub> | T <sup>o</sup> <sub>dor</sub> | T <sup>o</sup> <sub>tai</sub> |
|-------------------------------|-------------------------------|-------------------------------|-------------------------------|-------------------------------|
| T <sup>o</sup> <sub>ocu</sub> | 1.00                          | 0.992                         | 0.982                         | 0.991                         |
|                               | P<0.001                       | P<0.001                       | P<0.001                       | P<0.001                       |
| T <sup>o</sup> <sub>ear</sub> | 0.992                         | 1.00                          | 0.992                         | 0.980                         |
|                               | P<0.001                       | P<0.001                       | P<0.001                       | P<0.001                       |
| T <sup>o</sup> <sub>dor</sub> | 0.982                         | 0.992                         | 1.00                          | 0.970                         |
|                               | P<0.001                       | P<0.001                       | P<0.001                       | P<0.001                       |
| T <sup>o</sup> <sub>tai</sub> | 0.991                         | 0.980                         | 0.970                         | 1.00                          |
|                               | P<0.001                       | P<0.001                       | P<0.001                       | P<0.001                       |

**Table S5.** Correlations “Ketamine” (G<sub>5</sub>)

|                               | T <sup>o</sup> <sub>ocu</sub> | T <sup>o</sup> <sub>ear</sub> | T <sup>o</sup> <sub>dor</sub> | T <sup>o</sup> <sub>tai</sub> |
|-------------------------------|-------------------------------|-------------------------------|-------------------------------|-------------------------------|
| T <sup>o</sup> <sub>ocu</sub> | 1.00                          | 0.994                         | 0.976                         | 0.986                         |
|                               | P<0.001                       | P<0.001                       | P<0.001                       | P<0.001                       |
| T <sup>o</sup> <sub>ear</sub> | 0.994                         | 1.00                          | 0.986                         | 0.988                         |
|                               | P<0.001                       | P<0.001                       | P<0.001                       | P<0.001                       |
| T <sup>o</sup> <sub>dor</sub> | 0.976                         | 0.986                         | 1.00                          | 0.987                         |
|                               | P<0.001                       | P<0.001                       | P<0.001                       | P<0.001                       |
| T <sup>o</sup> <sub>tai</sub> | 0.986                         | 0.988                         | 0.987                         | 1.00                          |
|                               | P<0.001                       | P<0.001                       | P<0.001                       | P<0.001                       |

**Table S64.** Correlations “Combination of ketamine + CO<sub>2</sub>” (G<sub>6</sub>)

|                               | T <sup>o</sup> <sub>ocu</sub> | T <sup>o</sup> <sub>ear</sub> | T <sup>o</sup> <sub>dor</sub> | T <sup>o</sup> <sub>tai</sub> |
|-------------------------------|-------------------------------|-------------------------------|-------------------------------|-------------------------------|
| T <sup>o</sup> <sub>ocu</sub> | 1.00                          | 0.983                         | 0.986                         | 0.978                         |
|                               | P<.001                        | P<0.001                       | P<0.001                       | P<0.001                       |
| T <sup>o</sup> <sub>ear</sub> | 0.983                         | 1.00                          | 0.983                         | 0.990                         |
|                               | P<0.001                       | P<0.001                       | P<0.001                       | P<0.001                       |
| T <sup>o</sup> <sub>dor</sub> | 0.986                         | 0.983                         | 1.00                          | 0.988                         |
|                               | P<0.001                       | P<0.001                       | P<0.001                       | P<0.001                       |
| T <sup>o</sup> <sub>tai</sub> | 0.978                         | 0.990                         | 0.988                         | 1.00                          |
|                               | P<0.001                       | P<0.001                       | P<0.001                       | P<0.001                       |
